# Supplementary material for: Heat and Light Stability of Pumpkin-Based Carotenoids in a Photosensitive Food: A Carotenoid-Coloured Beverage
Source: MDPI journal article supplement (doi:10.3390/foods11030485), 2022-02-07
Supplement: s1 [file s1]

# Supplementary Materials

## Heat And Light Stability of Pumpkin-Based Carotenoids in a Photosensitive Food: A Carotenoid-Coloured Beverage

Sharmaine Atencio<sup>a\*</sup>, Sarah H.E. Verkempinck<sup>a</sup>, Kai Reineke<sup>b</sup>, Marc Hendrickx<sup>a</sup>, Ann Van Loey<sup>a</sup>

<sup>a</sup> KU Leuven, Department of Microbial and Molecular Systems, Laboratory of Food Technology,  
Kasteelpark Arenberg 22, Box 2457, 3001, Leuven, Belgium

<sup>b</sup> GNT Europa GmbH, Kackertstrasse 22, 52072 Aachen, Germany

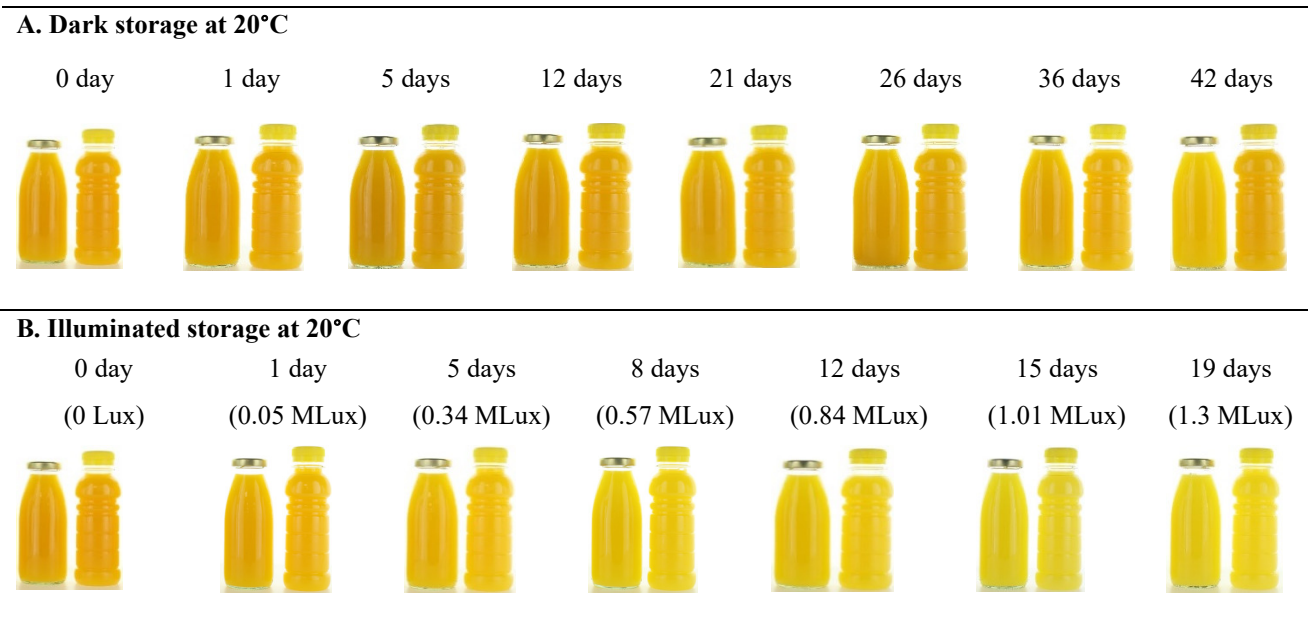

**Figure S1.** Model beverage samples during storage at 20°C in both (A) dark and (B) illuminated conditions.

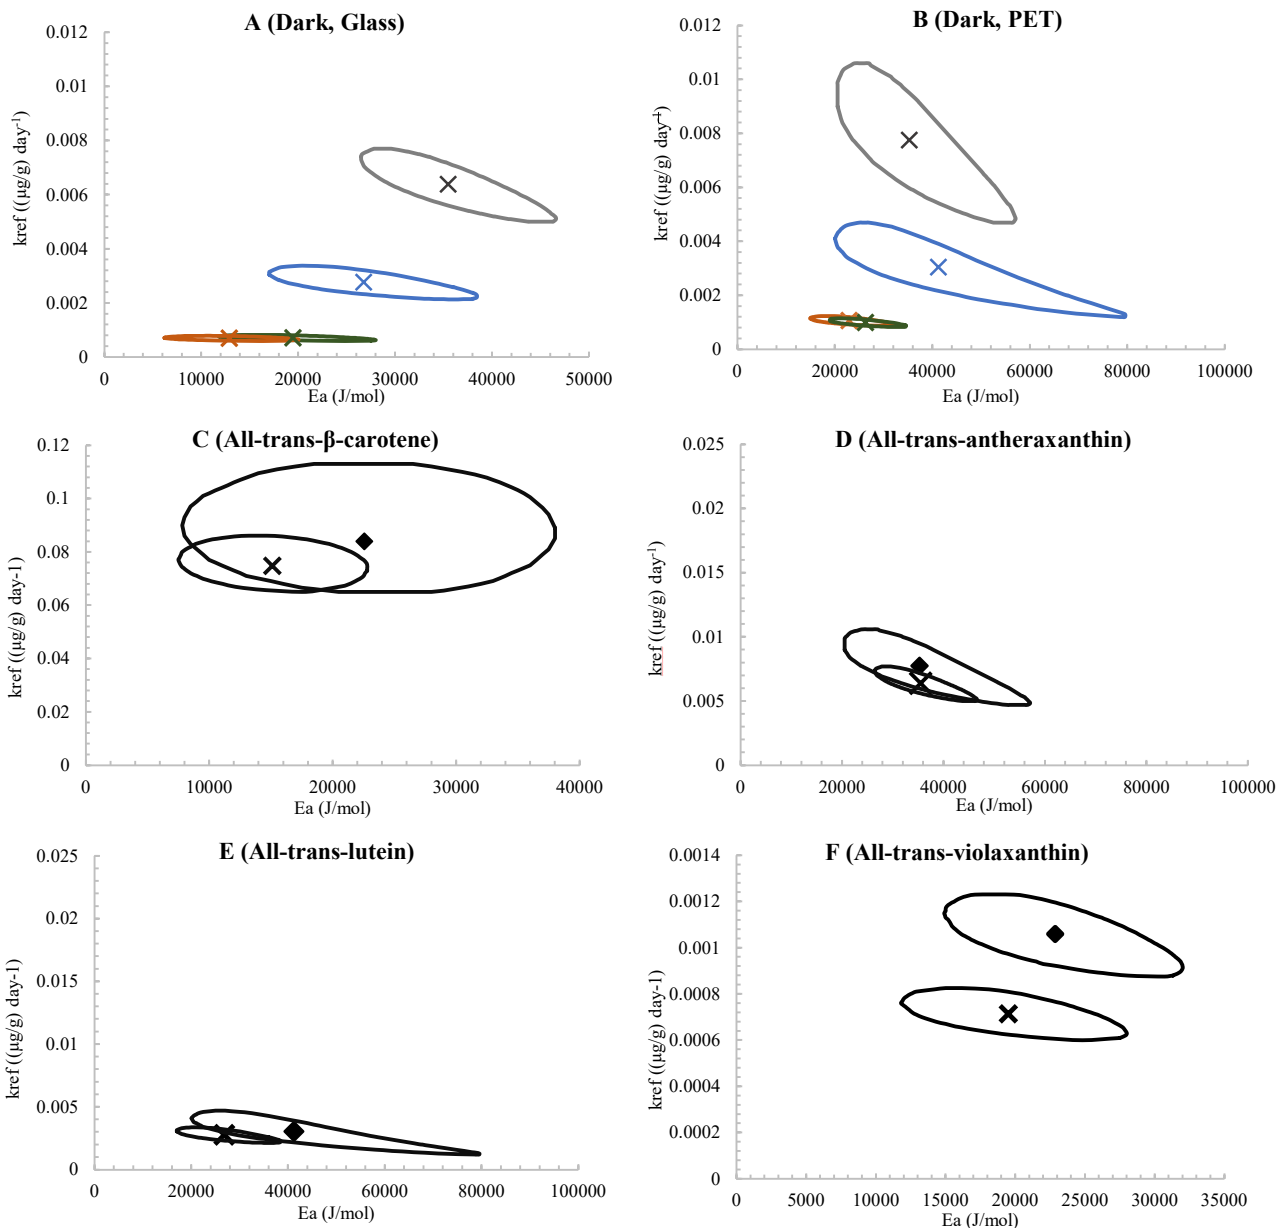

**Figure S2.** 90% Joint confidence regions of the estimated kinetic parameters ( $k_{\text{ref}}$  and  $E_a$ ) for the changes in all-trans-carotenoid which were modelled using the same kinetic model during dark storage in (A) glass bottles and (B) PET bottles. — All-trans-lutein; — All-trans-antheraxanthin; — All-trans-violaxanthin; and — All-trans-neoxanthin. Graphs (C–F) illustrate the impact of packaging material used (♦ PET and × glass bottles) on the  $k_{\text{ref}}$  and  $E_a$  of each all-trans-carotenoid studied during dark storage.

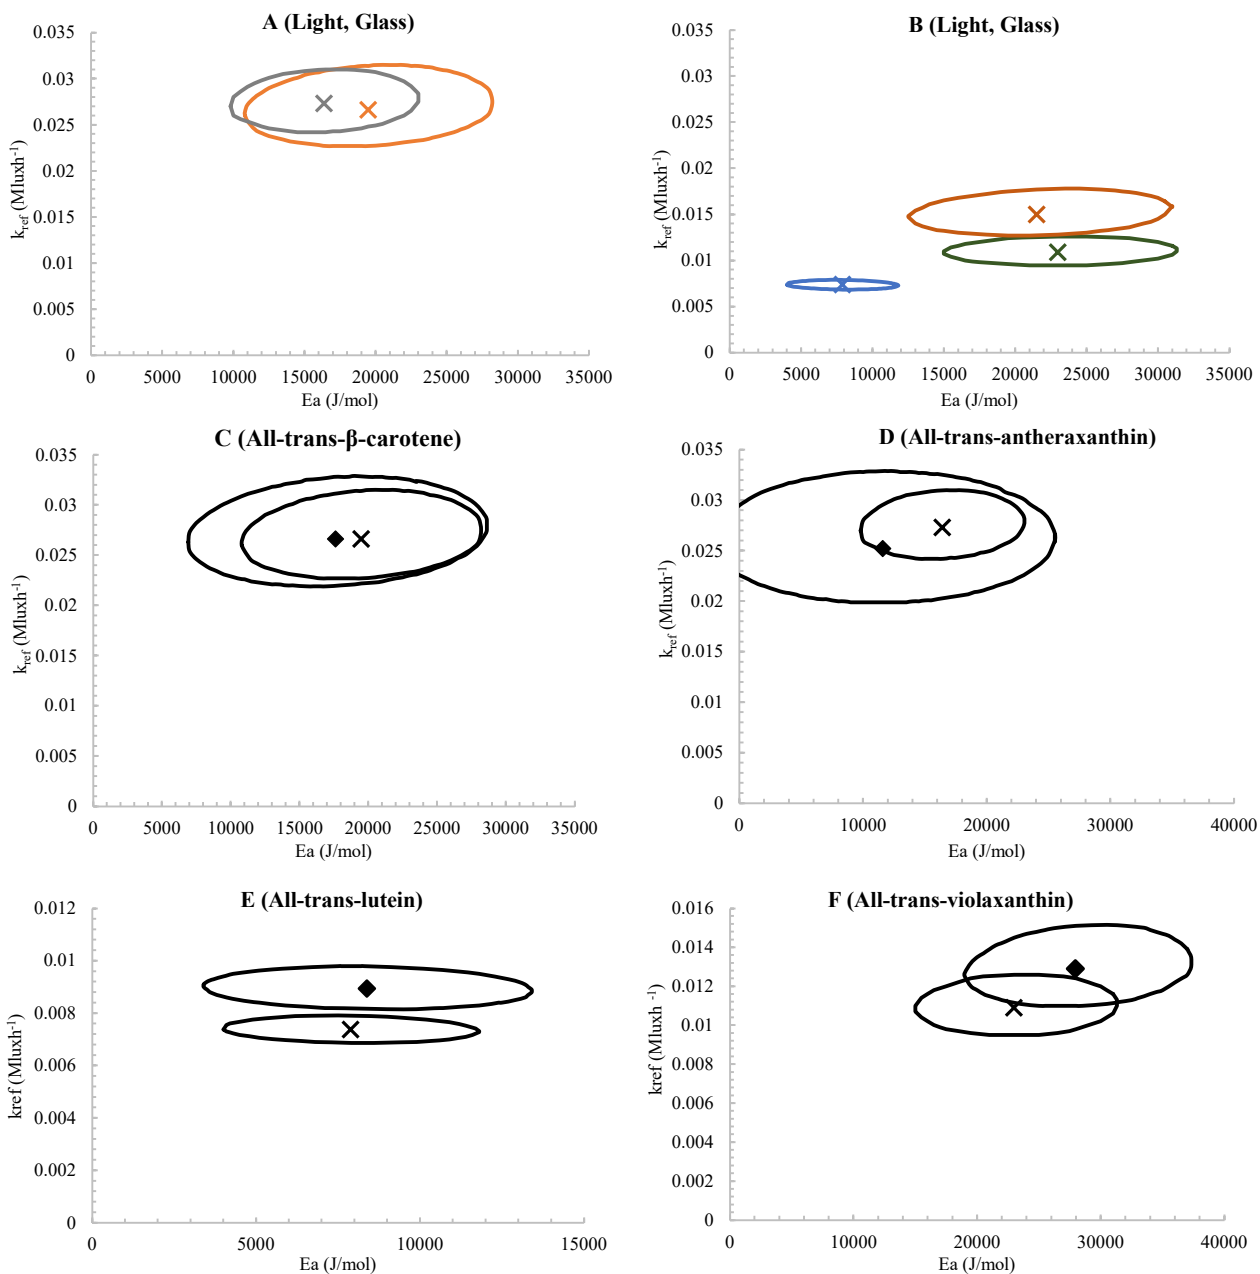

**Figure S3.** 90% Joint confidence regions (JCR) of the estimated kinetic parameters ( $k_{\text{ref}}$  and  $E_a$ ) for the changes in all-trans-carotenoid which fitted to similar kinetic order models during illuminated storage in glass bottles. **(A)** — All-trans-β-carotene and — All-trans-antheraxanthin; and **(B)** — All-trans-lutein, — All-trans-violaxanthin, and — All-trans-neoxanthin. Graphs **(C–F)** illustrate the impact of packaging material used (♦ PET and ✕ glass bottles) on the  $k_{\text{ref}}$  and  $E_a$  of each all-trans-carotenoid during illuminated storage.

**Table S1.** Chemical structure and absorption maxima of all-trans-carotenoids studied in the pumpkin juice concentrate-coloured beverage.

| Carotenoid               | Structure                                                                           | Absorption maxima (nm) <sup>a</sup> |     |         |
|--------------------------|-------------------------------------------------------------------------------------|-------------------------------------|-----|---------|
| All-trans-neoxanthin     | 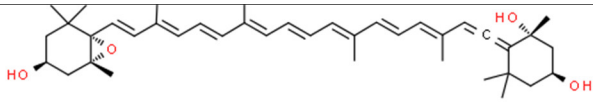  | 416                                 | 440 | 469     |
| All-trans-violaxanthin   |   | 415                                 | 439 | 467     |
| All-trans-antheraxanthin |   | 376                                 | 399 | 422 449 |
| All-trans-lutein         |   | 423                                 | 444 | 472     |
| All-trans-β-carotene     |  | 422                                 | 450 | 478     |

<sup>a</sup> Carotenoid extracts dissolved in methanol:acetone (2:1 v/v).
